# Supplementary material for: Gut Microbiota Alterations in Trace Amine-Associated Receptor 9 (TAAR9) Knockout Rats
Source: MDPI journal article supplement (doi:10.3390/biom12121823), 2022-12-06
Supplement: s1 [file s1]

Cladogram for all subjects and 17 taxa showing insignificant changes between the wild-type (WT) and TAAR9-KO (KO) rats

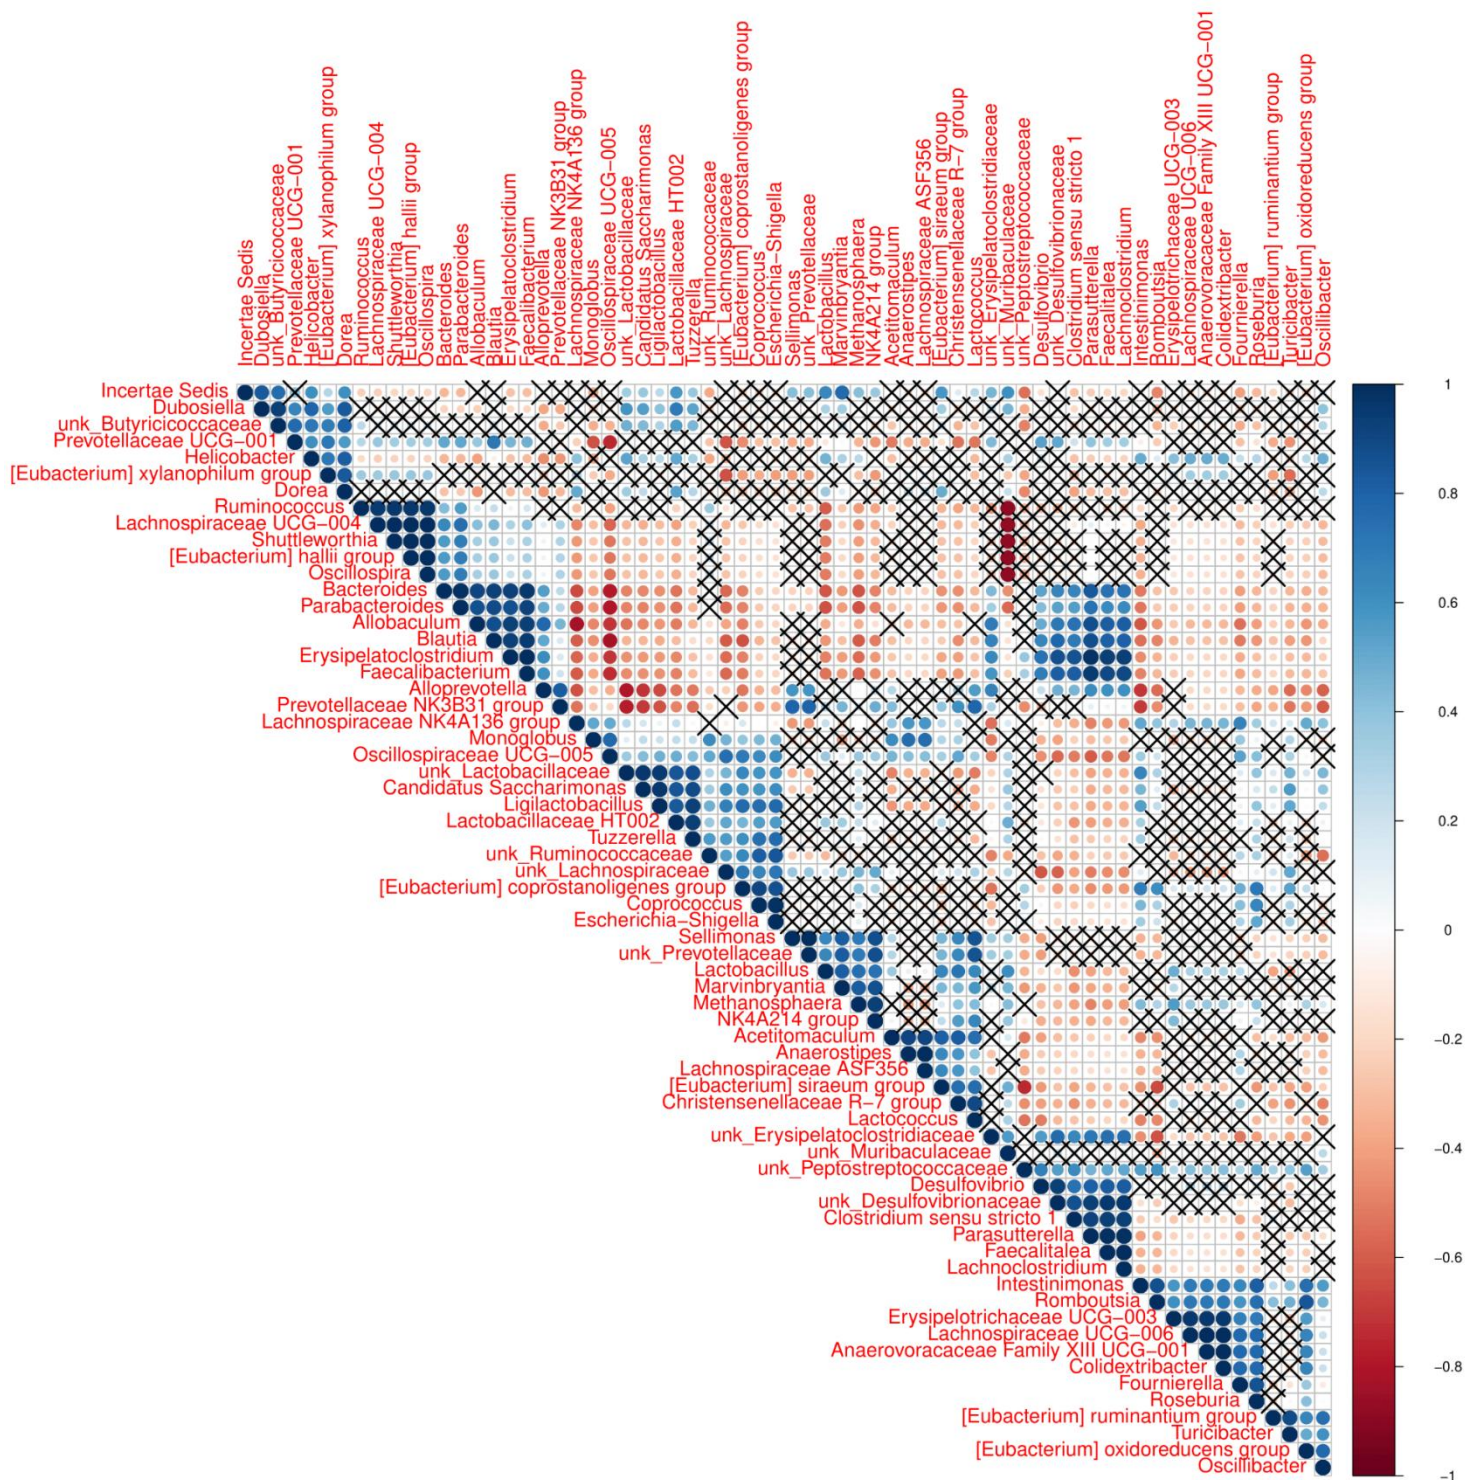

## Supplementary Figure S2

Pearson's correlation by genus abundance in the fecal microbiome of TAAR9-KO rats. Significant values ( $p < 0.05$ ) are shown by circles.
